# Supplementary material
Source: PubMed Central journal article supplement (PMC8574630)
Supplement: nqab249_supplemental_file.pdf [file nqab249_supplemental_file.pdf]

Socioeconomic inequities in diet quality among a nationally representative sample of adults living in Canada: an analysis of trends between 2004 and 2015; Dana Lee Oltstad; Online Supplementary Material

**Supplementary Table 1 Trends in gaps and gradients in HEI-2015 total and component scores by household educational attainment among adults who participated in the Canadian Community Health Survey – Nutrition in 2004 or 2015<sup>1</sup>**

| HEI-2015 scores                   | Absolute gaps (95% CI) |                         |                        | Relative gaps (95% CI) |                        |                        | Absolute gradients: Slope Index of Inequality (95% CI) |                        |                        | Relative gradients: Relative Index of Inequality (95% CI) |                        |                        |
|-----------------------------------|------------------------|-------------------------|------------------------|------------------------|------------------------|------------------------|--------------------------------------------------------|------------------------|------------------------|-----------------------------------------------------------|------------------------|------------------------|
|                                   | 2004                   | 2015                    | P-value for time trend | 2004                   | 2015                   | P-value for time trend | 2004                                                   | 2015                   | P-value for time trend | 2004                                                      | 2015                   | P-value for time trend |
| <b>Total</b>                      | 5.60<br>(4.22, 6.92)** | 8.36<br>(6.65, 10.22)** | <b>0.010</b>           | 1.10<br>(1.07, 1.12)** | 1.15<br>(1.11, 1.18)** | <b>0.020</b>           | 9.08<br>(7.83, 10.34)**                                | 9.5<br>(7.98, 11.15)** | 0.160                  | 1.17<br>(1.15, 1.20)**                                    | 1.17<br>(1.14, 1.20)** | 0.375                  |
| <b>Total fruits</b>               | 0.53<br>(0.32, 0.73)** | 0.73<br>(0.43, 0.99)**  | 0.305                  | 1.18<br>(1.10, 1.26)** | 1.27<br>(1.14, 1.39)** | 0.262                  | 1.00<br>(0.80, 1.20)**                                 | 0.92<br>(0.67, 1.17)** | 0.833                  | 1.38<br>(1.30, 1.48)**                                    | 1.37<br>(1.25, 1.49)** | 0.738                  |
| <b>Whole fruits</b>               | 0.35<br>(0.11, 0.58)*  | 0.91<br>(0.60, 1.21)**  | <b>0.006</b>           | 1.12<br>(1.03, 1.21)** | 1.35<br>(1.20, 1.50)** | <b>0.008</b>           | 0.89<br>(0.66, 1.11)**                                 | 1.19<br>(0.93, 1.46)** | <b>0.010</b>           | 1.35<br>(1.25, 1.45)**                                    | 1.48<br>(1.35, 1.61)** | <b>0.018</b>           |
| <b>Total vegetables</b>           | 0.16<br>(-0.01, 0.33)  | 0.49<br>(0.24, 0.73)**  | <b>0.028</b>           | 1.04<br>(0.99, 1.10)** | 1.16<br>(1.07, 1.25)** | <b>0.023</b>           | 0.40<br>(0.23, 0.57)**                                 | 0.72<br>(0.51, 0.93)** | <b>0.004</b>           | 1.12<br>(1.04, 1.16)**                                    | 1.26<br>(1.17, 1.31)** | <b>0.002</b>           |
| <b>Greens and beans</b>           | 0.71<br>(0.47, 0.95)** | 1.22<br>(0.94, 1.50)**  | <b>0.005</b>           | 1.68<br>(1.40, 1.96)** | 2.31<br>(1.83, 2.79)** | <b>0.015</b>           | 0.89<br>(0.67, 1.12)**                                 | 1.18<br>(0.91, 1.45)** | <b>0.029</b>           | 2.03<br>(1.70, 2.41)**                                    | 2.17<br>(1.81, 2.60)** | 0.332                  |
| <b>Whole grains</b>               | 0.13<br>(-0.31, 0.55)  | 0.57<br>(0.03, 1.09)*   | 0.217                  | 1.05<br>(0.87, 1.22)** | 1.16<br>(0.99, 1.33)** | 0.369                  | 0.69<br>(0.31, 1.07)**                                 | 1.01<br>(0.55, 1.47)** | 0.159                  | 1.33<br>(1.15, 1.53)**                                    | 1.33<br>(1.18, 1.50)** | 0.349                  |
| <b>Total dairy</b>                | 0.59<br>(0.21, 0.96)*  | 0.40<br>(-0.07, 0.87)   | 0.529                  | 1.14<br>(1.04, 1.23)** | 1.08<br>(0.97, 1.18)** | 0.386                  | 0.53<br>(0.17, 0.89)*                                  | 0.12<br>(-0.27, 0.52)  | 0.224                  | 1.13<br>(1.04, 1.22)*                                     | 1.02<br>(0.94, 1.11)   | 0.162                  |
| <b>Total protein foods</b>        | 0.39<br>(0.17, 0.58)** | 0.37<br>(0.17, 0.57)**  | 0.951                  | 1.14<br>(1.06, 1.22)** | 1.09<br>(1.04, 1.15)** | 0.385                  | 0.63<br>(0.44, 0.83)**                                 | 0.23<br>(0.06, 0.39)*  | <b>0.027</b>           | 1.25<br>(1.16, 1.33)**                                    | 1.05<br>(1.01, 1.10)*  | <b>0.002</b>           |
| <b>Seafood and plant proteins</b> | 0.72<br>(0.46, 0.97)** | 1.08<br>(0.77, 1.39)**  | 0.073                  | 1.48<br>(1.28, 1.68)** | 1.60<br>(1.36, 1.84)** | 0.439                  | 1.05<br>(0.82, 1.27)**                                 | 1.10<br>(0.83, 1.37)** | 0.517                  | 1.86<br>(1.63, 2.12)**                                    | 1.60<br>(1.42, 1.79)** | 0.233                  |
| <b>Fatty acids</b>                | 0.03<br>(-0.38, 0.44)  | 0.46<br>(-0.03, 0.96)   | 0.182                  | 1.01<br>(0.92, 1.08)** | 1.09<br>(0.98, 1.20)** | 0.173                  | 0.38<br>(0.01, 0.75)*                                  | 0.30<br>(-0.14, 0.74)  | 0.886                  | 1.08<br>(1.00, 1.16)*                                     | 1.06<br>(0.97, 1.15)   | 0.927                  |
| <b>Refined grains</b>             | 0.17<br>(-0.14, 0.48)  | 0.57<br>(0.11, 0.89)*   | 0.180                  | 1.02<br>(0.98, 1.05)** | 1.07<br>(1.01, 1.11)** | 0.157                  | 0.10<br>(0.10, 0.15)                                   | 0.61<br>(0.24, 0.99)*  | <b>0.037</b>           | 1.01<br>(0.97, 1.04)                                      | 1.07<br>(1.03, 1.13)*  | <b>0.032</b>           |
| <b>Sodium</b>                     | 0.55<br>(0.15, 0.95)*  | 0.89<br>(0.40, 1.36)**  | 0.289                  | 1.10<br>(1.02, 1.17)** | 1.16<br>(1.06, 1.26)** | 0.295                  | 0.60<br>(0.20, 1.00)*                                  | 0.96<br>(0.53, 1.40)** | 0.559                  | 1.11<br>(1.03, 1.19)*                                     | 1.17<br>(1.09, 1.26)** | 0.679                  |
| <b>Added sugars</b>               | 0.72<br>(0.48, 0.94)** | 0.62<br>(0.26, 0.97)*   | 0.666                  | 1.08<br>(1.05, 1.11)** | 1.07<br>(1.03, 1.12)** | 0.767                  | 1.09<br>(0.86, 1.33)**                                 | 0.83<br>(0.50, 1.16)** | 0.542                  | 1.13<br>(1.10, 1.17)**                                    | 1.10<br>(1.06, 1.15)** | 0.540                  |
| <b>Saturated fats</b>             | 0.55<br>(0.14, 0.94)*  | 0.20<br>(-0.25, 0.65)   | 0.243                  | 1.08<br>(1.01, 1.14)** | 1.03<br>(0.96, 1.10)** | 0.254                  | 0.78<br>(0.40, 1.16)**                                 | 0.33<br>(-0.06, 0.72)  | 0.085                  | 1.12<br>(1.06, 1.19)**                                    | 1.05<br>(0.99, 1.12)   | 0.100                  |

<sup>1</sup> 2004 weighted n=23,682,000; 2015 weighted n=27,566,000. Multivariable linear regression models examined trends in gaps, while generalized linear models examined trends in gradients in HEI-2015 total and component scores between 2004 and 2015. Data are weighted to be nationally representative and are adjusted for age, sex and dietary recall day. Weighted sample sizes are rounded in accordance with Statistics Canada's confidentiality policies. HEI, Healthy Eating Index.

\*p<0.05 for within year inequities, \*\*p<0.001 for within year inequities.

Socioeconomic inequities in diet quality among a nationally representative sample of adults living in Canada: an analysis of trends between 2004 and 2015; Dana Lee Olstad; Online Supplementary Material

**Supplementary Table 2 Trends in gaps and gradients in HEI-2015 total and component scores by household educational attainment among males who participated in the Canadian Community Health Survey – Nutrition in 2004 or 2015<sup>1</sup>**

| HEI-2015 scores                   | Absolute gaps (95% CI) |                        |                        | Relative gaps (95% CI) |                        |                        | Absolute gradients: Slope Index of Inequality (95% CI) |                          |                        | Relative gradients: Relative Index of Inequality (95% CI) |                        |                        |
|-----------------------------------|------------------------|------------------------|------------------------|------------------------|------------------------|------------------------|--------------------------------------------------------|--------------------------|------------------------|-----------------------------------------------------------|------------------------|------------------------|
|                                   | 2004                   | 2015                   | P-value for time trend | 2004                   | 2015                   | P-value for time trend | 2004                                                   | 2015                     | P-value for time trend | 2004                                                      | 2015                   | P-value for time trend |
| <b>Total</b>                      | 5.00<br>(4.08, 6.42)** | 8.30<br>(6.38, 9.94)** | <b>0.042</b>           | 1.09<br>(1.03, 1.11)** | 1.15<br>(1.10, 1.20)** | 0.066                  | 7.92<br>(6.17, 9.68)**                                 | 10.76<br>(8.57, 12.96)** | <b>0.013</b>           | 1.15<br>(1.12, 1.19)**                                    | 1.20<br>(1.15, 1.24)** | <b>0.040</b>           |
| <b>Total fruits</b>               | 0.55<br>(0.38, 0.77)** | 0.91<br>(0.75, 1.03)** | 0.186                  | 1.22<br>(1.09, 1.38)** | 1.38<br>(1.19, 1.57)** | 0.210                  | 0.94<br>(0.63, 1.25)**                                 | 1.18<br>(0.83, 1.54)**   | 0.204                  | 1.39<br>(1.25, 1.56)**                                    | 1.53<br>(1.34, 1.74)** | 0.202                  |
| <b>Whole fruits</b>               | 0.38<br>(0.10, 0.57)*  | 0.99<br>(0.56, 1.19)** | <b>0.046</b>           | 1.16<br>(1.01, 1.29)** | 1.43<br>(1.26, 1.64)** | 0.080                  | 0.68<br>(0.35, 1.01)**                                 | 1.41<br>(1.02, 1.79)**   | <b>0.001</b>           | 1.28<br>(1.14, 1.44)**                                    | 1.62<br>(1.42, 1.85)** | <b>0.003</b>           |
| <b>Total vegetables</b>           | 0.14<br>(0.08, 0.23)   | 0.17<br>(0.10, 0.25)   | 0.914                  | 1.04<br>(0.94, 1.14)** | 1.05<br>(0.92, 1.12)** | 0.890                  | 0.28<br>(0.02, 0.54)*                                  | 0.59<br>(0.25, 0.93)*    | 0.113                  | 1.09<br>(1.03, 1.17)*                                     | 1.21<br>(1.14, 1.25)** | 0.101                  |
| <b>Greens and beans</b>           | 0.63<br>(0.44, 0.81)** | 0.92<br>(0.83, 1.02)** | 0.292                  | 1.66<br>(1.31, 2.08)** | 1.89<br>(1.54, 2.19)** | 0.531                  | 0.78<br>(0.46, 1.10)**                                 | 1.15<br>(0.78, 1.52)**   | 0.066                  | 1.97<br>(1.49, 2.60)**                                    | 2.27<br>(1.74, 2.96)** | 0.382                  |
| <b>Whole grains</b>               | -0.09<br>(-0.01, 0.15) | 1.00<br>(0.14, 1.29)*  | <b>0.029</b>           | 0.96<br>(0.74, 1.20)   | 1.35<br>(1.18, 1.57)** | 0.060                  | 0.47<br>(-0.06, 1.01)                                  | 1.32<br>(0.65, 1.98)**   | <b>0.022</b>           | 1.23<br>(0.99, 1.54)                                      | 1.47<br>(1.22, 1.77)** | 0.086                  |
| <b>Total dairy</b>                | 0.59<br>(0.24, 0.99)*  | 0.51<br>(0.21, 0.95)   | 0.863                  | 1.16<br>(1.04, 1.30)** | 1.11<br>(1.00, 1.26)** | 0.686                  | 0.36<br>(-0.14, 0.87)                                  | 0.22<br>(-0.33, 0.78)    | 0.829                  | 1.09<br>(0.96, 1.23)                                      | 1.05<br>(0.93, 1.18)   | 0.728                  |
| <b>Total protein foods</b>        | 0.32<br>(0.09, 0.57)*  | 0.33<br>(0.11, 0.59)   | 0.968                  | 1.11<br>(1.03, 1.23)** | 1.08<br>(1.04, 1.13)** | 0.676                  | 0.52<br>(0.24, 0.80)**                                 | 0.22<br>(-0.01, 0.47)    | 0.324                  | 1.20<br>(1.09, 1.33)**                                    | 1.05<br>(0.99, 1.11)   | 0.108                  |
| <b>Seafood and plant proteins</b> | 0.55<br>(0.14, 0.93)*  | 0.91<br>(0.62, 1.21)** | 0.261                  | 1.34<br>(1.21, 1.49)** | 1.47<br>(1.29, 1.63)** | 0.555                  | 0.91<br>(0.59, 1.23)**                                 | 1.19<br>(0.79, 1.58)**   | 0.210                  | 1.74<br>(1.44, 2.11)**                                    | 1.68<br>(1.41, 2.00)** | 0.943                  |
| <b>Fatty acids</b>                | 0.26<br>(-0.25, 0.65)  | 0.16<br>(-0.15, 0.55)  | 0.837                  | 1.05<br>(1.02, 1.13)** | 1.03<br>(0.99, 1.10)** | 0.860                  | 0.51<br>(-0.01, 1.05)                                  | 0.22<br>(-0.37, 0.81)    | 0.543                  | 1.11<br>(0.99, 1.23)                                      | 1.04<br>(0.93, 1.16)   | 0.508                  |
| <b>Refined grains</b>             | -0.14<br>(-0.57, 0.39) | 0.19<br>(-0.19, 0.57)  | 0.397                  | 0.98<br>(0.90, 1.03)** | 1.02<br>(0.97, 1.06)** | 0.396                  | -0.15<br>(-0.62, 0.31)                                 | 0.51<br>(-0.02, 1.05)    | 0.074                  | 0.98<br>(0.92, 1.03)                                      | 1.06<br>(0.99, 1.13)   | 0.071                  |
| <b>Sodium</b>                     | 0.22<br>(-0.03, 0.50)  | 1.23<br>(0.48, 1.67)*  | <b>0.025</b>           | 1.17<br>(1.09, 1.23)** | 1.03<br>(0.97, 1.10)*  | <b>0.026</b>           | 0.64<br>(0.06, 1.21)*                                  | 1.2<br>(0.67, 1.90)**    | 0.233                  | 1.12<br>(1.01, 1.24)*                                     | 1.24<br>(1.11, 1.37)** | 0.281                  |
| <b>Added sugars</b>               | 0.57<br>(0.11, 1.06)*  | 0.60<br>(0.14, 1.09)*  | 0.916                  | 1.06<br>(0.99, 1.14)** | 1.07<br>(1.01, 1.16)** | 0.863                  | 0.88<br>(0.54, 1.22)**                                 | 1.02<br>(0.53, 1.50)**   | 0.435                  | 1.11<br>(1.06, 1.15)**                                    | 1.13<br>(1.06, 1.19)** | 0.436                  |
| <b>Saturated fats</b>             | 1.00<br>(0.86, 1.12)*  | 0.46<br>(-0.14, 1.04)  | 0.209                  | 1.16<br>(1.05, 1.25)** | 1.07<br>(1.01, 1.14)** | 0.230                  | 1.05<br>(0.51, 1.59)**                                 | 0.40<br>(-0.12, 0.94)    | 0.053                  | 1.17<br>(1.08, 1.27)**                                    | 1.06<br>(0.98, 1.15)   | 0.065                  |

<sup>1</sup>2004 weighted n=11,846,000; 2015 weighted n=13,788,000. Multivariable linear regression models examined trends in gaps, while generalized linear models examined trends in gradients in HEI-2015 total and component scores between 2004 and 2015. Data are weighted to be nationally representative and are adjusted for age and dietary recall day. Weighted sample sizes are rounded in accordance with Statistics Canada's confidentiality policies. HEI, Healthy Eating Index.

\*p<0.05 for within year inequities, \*\*p<0.001 for within year inequities.

Socioeconomic inequities in diet quality among a nationally representative sample of adults living in Canada: an analysis of trends between 2004 and 2015; Dana Lee Olstad; Online Supplementary Material

**Supplementary Table 3 Trends in gaps and gradients in HEI-2015 total and component scores by household educational attainment among females who participated in the Canadian Community Health Survey-Nutrition in 2004 or 2015<sup>1</sup>**

| HEI-2015 scores                   | Absolute gaps (95% CI) |                        |                        | Relative gaps (95% CI) |                        |                        | Absolute gradients: Slope Index of Inequality (95% CI) |                         |                        | Relative gradients: Relative Index of Inequality (95% CI) |                        |                        |
|-----------------------------------|------------------------|------------------------|------------------------|------------------------|------------------------|------------------------|--------------------------------------------------------|-------------------------|------------------------|-----------------------------------------------------------|------------------------|------------------------|
|                                   | 2004                   | 2015                   | P-value for time trend | 2004                   | 2015                   | P-value for time trend | 2004                                                   | 2015                    | P-value for time trend | 2004                                                      | 2015                   | P-value for time trend |
| <b>Total</b>                      | 6.40<br>(4.92, 7.54)** | 8.40<br>(7.52, 10.7)** | <b>0.004</b>           | 1.11<br>(1.08, 1.14)** | 1.14<br>(1.12, 1.18)** | 0.237                  | 10.30<br>(8.56, 12.03)**                               | 8.33<br>(6.07, 10.59)** | 0.633                  | 1.19<br>(1.16, 1.23)**                                    | 1.14<br>(1.10, 1.19)** | 0.470                  |
| <b>Total fruits</b>               | 0.57<br>(0.30, 0.78)** | 0.52<br>(0.27, 0.74)*  | 0.832                  | 1.18<br>(1.09, 1.26)** | 1.17<br>(1.07, 1.25)** | 0.946                  | 1.06<br>(0.77, 1.34)**                                 | 0.65<br>(0.30, 0.99)**  | 0.305                  | 1.37<br>(1.26, 1.49)**                                    | 1.24<br>(1.10, 1.39)** | 0.440                  |
| <b>Whole fruits</b>               | 0.39<br>(0.12, 0.66)*  | 0.83<br>(0.58, 1.11)** | 0.093                  | 1.13<br>(1.01, 1.25)** | 1.29<br>(1.19, 1.44)** | 0.087                  | 1.09<br>(0.77, 1.40)**                                 | 0.96<br>(0.61, 1.31)**  | 0.700                  | 1.39<br>(1.26, 1.53)**                                    | 1.36<br>(1.22, 1.53)** | 0.607                  |
| <b>Total vegetables</b>           | 0.19<br>(-0.01, 0.36)  | 0.80<br>(0.48, 1.10)** | <b>0.001</b>           | 1.05<br>(0.95, 1.17)** | 1.26<br>(1.18, 1.38)** | <b>0.001</b>           | 0.51<br>(0.28, 0.74)**                                 | 0.83<br>(0.57, 1.09)**  | <b>0.009</b>           | 1.16<br>(1.05, 1.21)**                                    | 1.29<br>(1.22, 1.37)** | <b>0.005</b>           |
| <b>Greens and beans</b>           | 0.82<br>(0.50, 1.17)** | 1.53<br>(1.20, 1.86)** | <b>0.003</b>           | 1.73<br>(1.43, 2.05)** | 2.86<br>(2.44, 3.09)** | <b>0.002</b>           | 0.99<br>(0.69, 1.29)**                                 | 1.19<br>(0.81, 1.58)**  | 0.191                  | 2.02<br>(1.63, 2.51)**                                    | 2.08<br>(1.64, 2.64)** | 0.584                  |
| <b>Whole grains</b>               | 0.34<br>(0.12, 0.54)   | 0.11<br>(-0.09, 0.27)  | 0.632                  | 1.13<br>(1.02, 1.25)** | 1.02<br>(0.95, 1.08)** | 0.484                  | 0.90<br>(0.41, 1.39)**                                 | 0.74<br>(0.09, 1.39)*   | 0.722                  | 1.40<br>(1.17, 1.66)**                                    | 1.23<br>(1.04, 1.45)*  | 0.694                  |
| <b>Total dairy</b>                | 0.67<br>(0.28, 1.10)*  | 0.28<br>(0.12, 0.41)   | 0.357                  | 1.15<br>(0.98, 1.30)** | 1.05<br>(0.94, 1.16)** | 0.291                  | 0.72<br>(0.23, 1.21)*                                  | 0.03<br>(-0.53, 0.61)   | 0.150                  | 1.16<br>(1.05, 1.29)*                                     | 1.01<br>(0.90, 1.13)   | 0.134                  |
| <b>Total protein foods</b>        | 0.44<br>(0.18, 0.71)*  | 0.43<br>(0.21, 0.69)*  | 0.919                  | 1.16<br>(1.02, 1.32)** | 1.11<br>(1.07, 1.14)** | 0.449                  | 0.75<br>(0.49, 1.01)**                                 | 0.23<br>(0.01, 0.45)*   | <b>0.035</b>           | 1.29<br>(1.18, 1.41)**                                    | 1.06<br>(1.00, 1.12)*  | <b>0.008</b>           |
| <b>Seafood and plant proteins</b> | 0.87<br>(0.62, 1.14)** | 1.26<br>(0.93, 1.41)** | 0.120                  | 1.62<br>(1.33, 1.97)** | 1.75<br>(1.41, 2.03)** | 0.540                  | 1.17<br>(0.85, 1.49)**                                 | 1.01<br>(0.63, 1.39)**  | 0.651                  | 1.94<br>(1.62, 2.32)**                                    | 1.51<br>(1.29, 1.77)** | 0.081                  |
| <b>Fatty acids</b>                | -0.19<br>(-0.47, 0.21) | 0.76<br>(0.37, 1.06)*  | <b>0.037</b>           | 0.96<br>(0.88, 1.04)** | 1.16<br>(1.03, 1.32)** | <b>0.037</b>           | 0.24<br>(-0.31, 0.79)                                  | 0.36<br>(-0.23, 0.97)   | 0.446                  | 1.04<br>(0.93, 1.17)                                      | 1.07<br>(0.95, 1.21)   | 0.457                  |
| <b>Refined grains</b>             | 0.47<br>(0.03, 0.92)*  | 0.81<br>(0.53, 1.11)*  | 0.276                  | 1.05<br>(1.02, 1.11)** | 1.10<br>(1.07, 1.15)** | 0.225                  | 0.39<br>(0.01, 0.77)*                                  | 0.73<br>(0.24, 1.21)*   | 0.274                  | 1.04<br>(1.00, 1.09)*                                     | 1.09<br>(1.03, 1.16)*  | 0.241                  |
| <b>Sodium</b>                     | 0.86<br>(0.50, 1.17)*  | 0.54<br>(0.14, 1.02)   | 0.483                  | 1.16<br>(1.06, 1.27)** | 1.09<br>(1.02, 1.17)** | 0.483                  | 0.59<br>(0.09, 1.09)*                                  | 0.65<br>(0.01, 1.29)*   | 0.729                  | 1.11<br>(1.01, 1.21)*                                     | 1.11<br>(1.00, 1.23)*  | 0.648                  |
| <b>Added sugars</b>               | 0.86<br>(0.39, 1.37)** | 0.63<br>(0.33, 0.96)*  | 0.417                  | 1.10<br>(1.05, 1.14)** | 1.07<br>(1.00, 1.13)** | 0.499                  | 1.30<br>(1.00, 1.61)**                                 | 0.64<br>(0.21, 1.07)*   | 0.063                  | 1.16<br>(1.12, 1.20)**                                    | 1.08<br>(1.02, 1.13)*  | 0.066                  |
| <b>Saturated fats</b>             | 0.13<br>(-0.23, 0.54)  | -0.06<br>(-0.51, 0.48) | 0.644                  | 1.01<br>(0.94, 1.08)** | 0.99<br>(0.95, 1.04)** | 0.645                  | 0.54<br>(0.03, 1.05)*                                  | 0.25<br>(-0.28, 0.80)   | 0.597                  | 1.08<br>(1.00, .17)*                                      | 1.04<br>(0.95, 1.13)   | 0.618                  |

<sup>1</sup>2004 weighted n=11,836,000; 2015 weighted n=13,778,000. Multivariable linear regression models examined trends in gaps, while generalized linear models examined trends in gradients in HEI-2015 total and component scores between 2004 and 2015. Data are weighted to be nationally representative and are adjusted for age and dietary recall day. Weighted sample sizes are rounded in accordance with Statistics Canada's confidentiality policies. HEI, Healthy Eating Index.

\*p<0.05 for within year inequities, \*\*p<0.001 for within year inequities.
